# Supplementary material for: Dissolving organic matter from low-organic sewage sludge for shortening the anaerobic digestion time
Source: Royal Society of Chemistry journal article supplement (doi:10.1039/c8ra06726k), 2018-01-01
Supplement: c8ra06726k1.pdf [file c8ra06726k1.pdf]

Fig. S1 Perturbation plots of EAH and effluent supernatant pH, where  $X_1$ -alkaline hydrolysis pH,  $X_2$ -distilled water volume, and  $X_3$ -sludge sample volume

Fig. S2 Three-dimensional surface response plot of EAH and effluent supernatant pH

Fig. S3 Titration curve for the sludge sample

**Fig. S1**

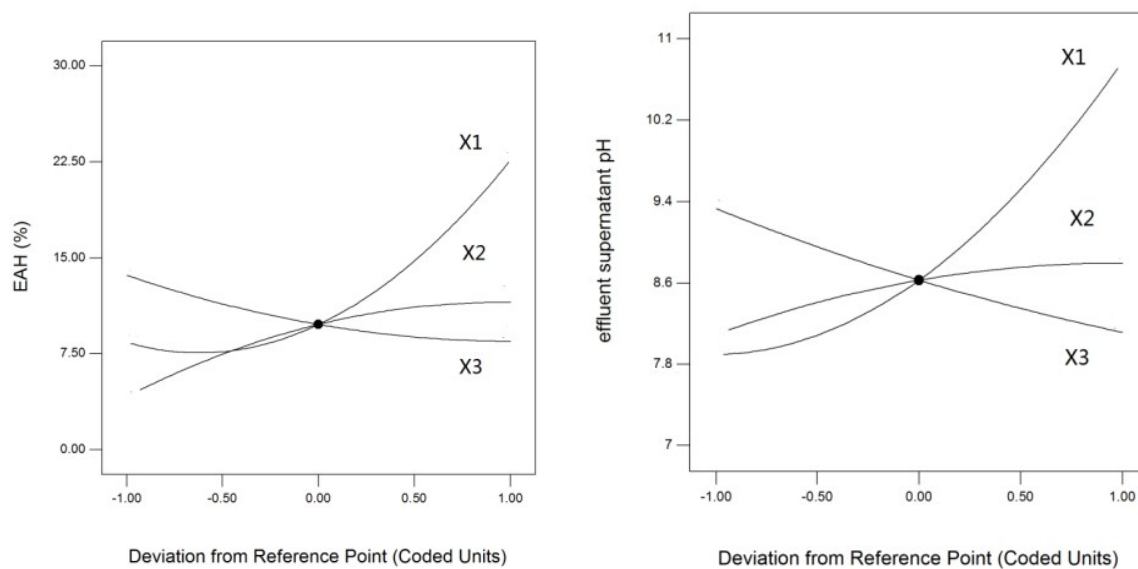

Fig. S2

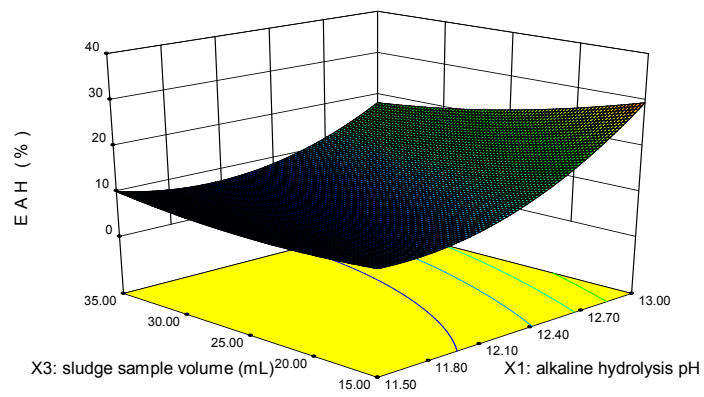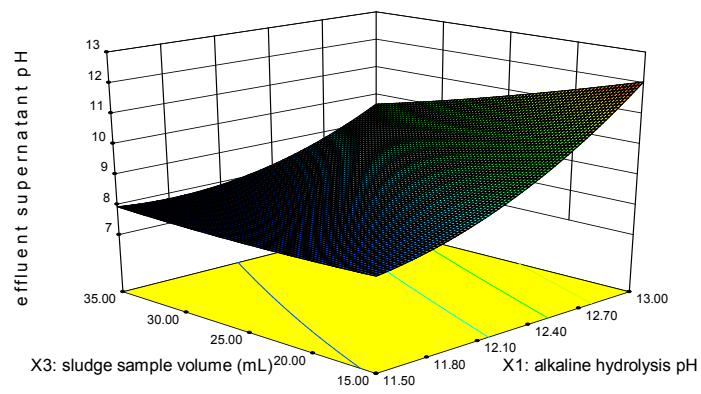

**Fig. S3**

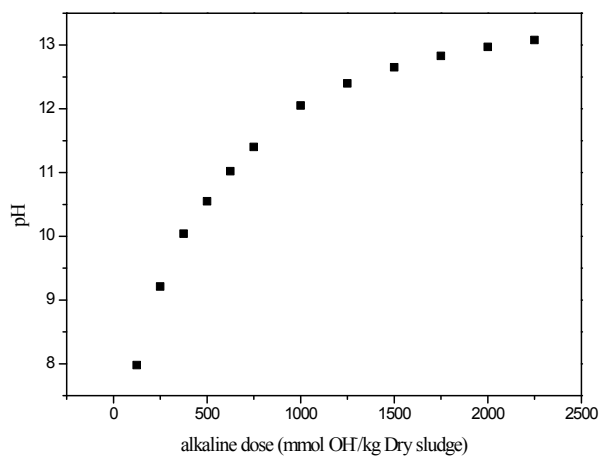

Table S1 Analysis of variance for the RSM quadratic model, where  $X_1$ -alkaline hydrolysis pH,  $X_2$ -distilled water volume,  $X_3$ -sludge sample volume,  $Y_1$ -EAH, and  $Y_2$  -effluent supernatant pH

**Table S1**

| Source   | Sum of squares |           | Mean square |           | F value   |           | p-value    |                 |
|----------|----------------|-----------|-------------|-----------|-----------|-----------|------------|-----------------|
|          | $Y_1$          | $Y_2$     | $Y_1$       | $Y_2$     | $Y_1$     | $Y_2$     | $Y_1$      | $Y_2$           |
| Model    | 865.8<br>5     | 26.1<br>5 | 96.21       | 2.91      | 6.81      | 15.2<br>9 | 0.009<br>6 | 0.000<br>8      |
| $X_1$    | 406.4<br>1     | 16.6<br>5 | 406.4<br>1  | 16.6<br>5 | 28.7<br>6 | 87.6<br>0 | 0.001<br>0 | <<br>0.000<br>1 |
| $X_2$    | 108.0<br>3     | 0.98      | 108.0<br>3  | 0.98      | 7.65      | 5.16      | 0.027<br>9 | 0.057<br>4      |
| $X_3$    | 54.00          | 2.98      | 54.00       | 2.98      | 3.82      | 15.6<br>7 | 0.091<br>5 | 0.005<br>5      |
| $X_1X_2$ | 76.97          | 1.90      | 76.97       | 1.90      | 5.45      | 10.0<br>2 | 0.052<br>3 | 0.015<br>8      |
| $X_1X_3$ | 38.63          | 1.32      | 38.63       | 1.32      | 2.73      | 6.96      | 0.142<br>2 | 0.033<br>5      |
| $X_2X_3$ | 1.50           | 0.05<br>3 | 1.50        | 0.05<br>3 | 0.11      | 0.28      | 0.754<br>0 | 0.614<br>1      |
| $X_1^2$  | 158.2<br>2     | 2.11      | 158.2<br>2  | 2.11      | 11.2<br>0 | 11.1<br>2 | 0.012<br>3 | 0.012<br>5      |
| $X_2^2$  | 10.08          | 0.15      | 10.08       | 0.15      | 0.71      | 0.77      | 0.426<br>3 | 0.409<br>1      |
| $X_3^2$  | 11.81          | 0.03      | 11.81       | 0.03      | 0.84      | 0.19      | 0.391      | 0.673           |

---

|          |       |      |       |      |  |   |   |
|----------|-------|------|-------|------|--|---|---|
|          |       | 7    |       | 7    |  | 0 | 1 |
| Residual | 98.91 | 1.33 | 14.13 | 0.19 |  |   |   |

---
